# Supplementary material
Source: bioRxiv or medRxiv preprint supplement (https://www.biorxiv.org/highwire/filestream/134117/field_highwire_adjunct_files/0/444521-1.pdf)
Supplement: Supplementary file [file 444521-1.pdf]

Regular Tiles

Resampled Tile

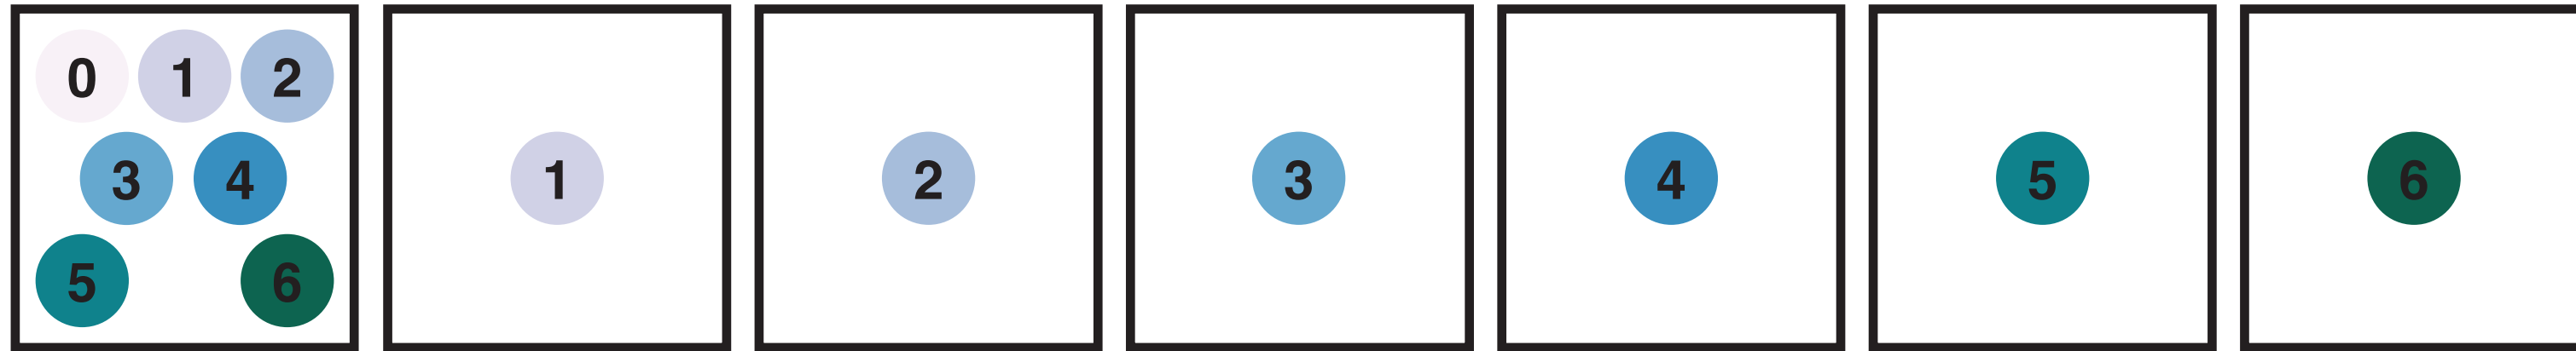

Duplicate Resampled Tile

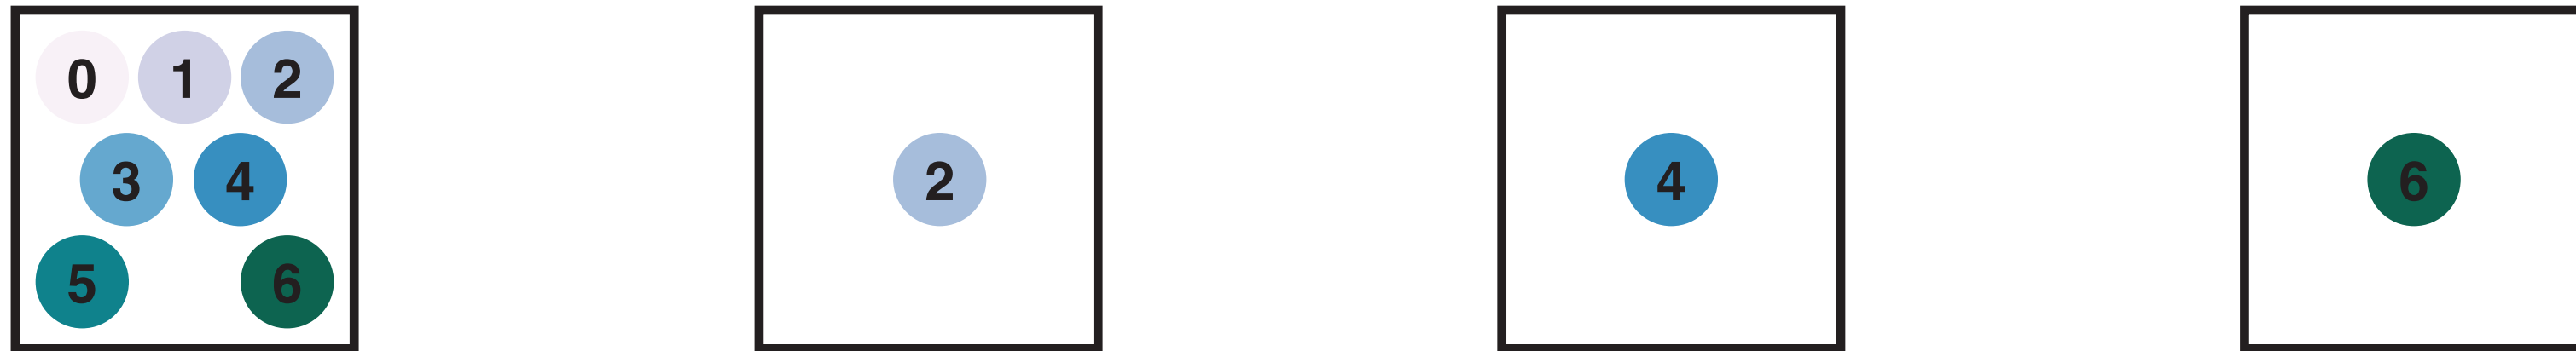

Duplicate Tiles
